# Supplementary material
Source: Springer Nature journal article supplement (https://www.springermedizin.de/resource/supplementary/12885_2006_546_MOESM5_ESM.pdf/9469726)

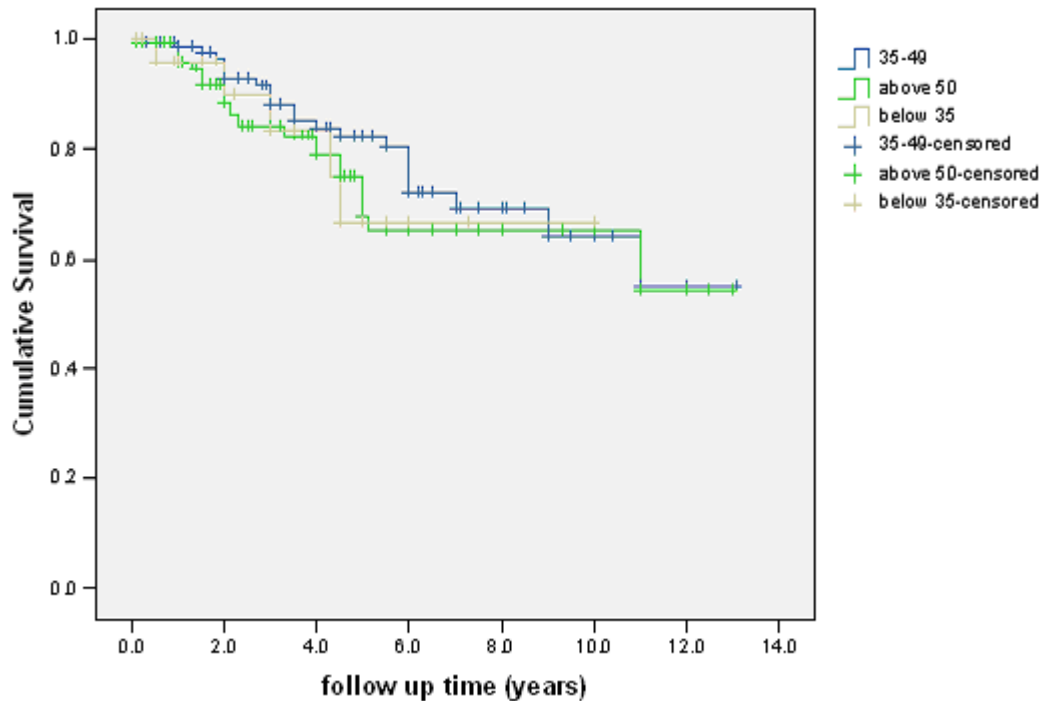

Supplement: MOESM5 [file 9469726]
